# Supplementary material for: Design and properties of a new family of bridged bis(nitraminotetrazoles) as promising energetic materials
Source: Royal Society of Chemistry journal article supplement (doi:10.1039/c8nj05633a), 2019-01-01
Supplement: c8nj05633a1.pdf [file c8nj05633a1.pdf]

# Design and Properties of a New Family of Bridged Bis(nitraminotetrazoles) as Promising Energetic Materials

Piao He<sup>a\*</sup>, Haozheng Mei<sup>b</sup>, Junqing Yang<sup>b</sup> and Jianguo Zhang<sup>b</sup>

<sup>a</sup> College of Chemistry and Chemical Engineering, Central South University, Changsha 410083, Hunan, P. R. China

<sup>b</sup> State Key Laboratory of Explosion Science and Technology, Beijing Institute of Technology, Beijing 100081 P. R. China

## Table of Contents

1. Selected optimized parameters
2. HOMO-LUMO and energy gap
3. Thermodynamic parameters
4. Calculations description
5. References

## 1. Selected optimized parameters

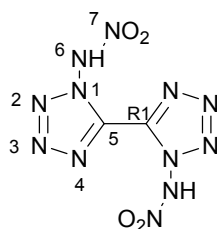

**Figure S1** New bridged bis(nitraminotetrazoles)

---

\*Corresponding authors: Piao He, E-mail: piaohe@csu.edu.cn

**Table S1** Selected optimized parameters of bridged bis(nitraminotetrazoles)

| Bond length/angle <sup>a</sup> | 1     | 2      | 3      | 4      | 5      | 6      | 7      | 8      |
|--------------------------------|-------|--------|--------|--------|--------|--------|--------|--------|
| N1-N2                          | 1.349 | 1.374  | 1.365  | 1.352  | 1.372  | 1.377  | 1.381  | 1.347  |
| N2-N3                          | 1.280 | 1.268  | 1.272  | 1.281  | 1.268  | 1.267  | 1.267  | 1.288  |
| N3-N4                          | 1.362 | 1.382  | 1.371  | 1.361  | 1.376  | 1.373  | 1.373  | 1.355  |
| N1-N6                          | 1.366 | 1.352  | 1.361  | 1.362  | 1.358  | 1.354  | 1.354  | 1.362  |
| N6-N7                          | 1.478 | 1.463  | 1.480  | 1.481  | 1.467  | 1.493  | 1.484  | 1.479  |
| C5-N1                          | 1.367 | 1.361  | 1.355  | 1.358  | 1.358  | 1.361  | 1.354  | 1.360  |
| C5-N4                          | 1.308 | 1.298  | 1.306  | 1.310  | 1.300  | 1.305  | 1.308  | 1.312  |
| C5-R1                          | 1.458 | 1.321  | 1.493  | 1.484  | 1.381  | 1.365  | 1.368  | 1.388  |
| N1-N2-N3                       | 106.6 | 106.0  | 105.8  | 106.4  | 106.3  | 105.6  | 105.6  | 106.0  |
| N1-C5-N4                       | 108.0 | 109.4  | 107.6  | 107.9  | 109.3  | 108.5  | 108.7  | 108.0  |
| N1-N6-N7                       | 113.2 | 114.9  | 113.4  | 113.1  | 114.1  | 113.5  | 113.7  | 113.2  |
| N4-C5-R1                       | 126.4 | 130.1  | 127.7  | 126.9  | 125.2  | 130.7  | 127.0  | 132.4  |
| N1-N2-N3-N4                    | -0.2  | 0.5    | -1.1   | -0.1   | 0.4    | 0.7    | -0.9   | -1.3   |
| N2-N1-N6-N7                    | 83.2  | 74.5   | -81.6  | -82.4  | 78.8   | 76.2   | -75.9  | -81.5  |
| N3-N4-C5-R1                    | 177.9 | -179.7 | -178.9 | -175.9 | -177.0 | -179.9 | -176.7 | 178.76 |

<sup>a</sup> Bond length (Å), Bond angle (°), Dihedral angle (°). R1 denotes the atom directly connected to C1 atom.

## 2. HOMO-LUMO and energy gap

**Table S2** HOMO-LUMO and energy gap of bridged bis(nitraminotetrazoles) (eV)

| Energy | LUMO  | HOMO  | $\Delta E_{\text{LUMO-HOMO}}$ |
|--------|-------|-------|-------------------------------|
| 1      | -4.85 | -8.41 | 3.55                          |
| 2      | -2.74 | -8.46 | 5.72                          |
| 3      | -3.10 | -8.57 | 5.47                          |
| 4      | -4.02 | -8.93 | 4.91                          |
| 5      | -3.11 | -8.12 | 5.01                          |
| 6      | -3.08 | -7.96 | 4.88                          |
| 7      | -2.83 | -8.00 | 5.17                          |
| 8      | -4.61 | -8.34 | 3.73                          |

### 3. Thermodynamic parameters

**Table S3** Thermodynamic parameters of bridged bis(nitraminotetrazoles)

| Energy   | ZPE        | $U$        | $H$        | $G$        | $S$            | $C_v$          |
|----------|------------|------------|------------|------------|----------------|----------------|
|          | (kcal/mol) | (kcal/mol) | (kcal/mol) | (kcal/mol) | (kcal/(mol·K)) | (kcal/(mol·K)) |
| <b>1</b> | 88.84      | 100.60     | 101.19     | 56.24      | 150.76         | 66.79          |
| <b>2</b> | 111.13     | 123.16     | 123.76     | 77.45      | 155.32         | 66.86          |
| <b>3</b> | 87.55      | 97.37      | 97.96      | 57.93      | 134.29         | 55.07          |
| <b>4</b> | 75.34      | 85.53      | 86.12      | 45.51      | 136.24         | 56.98          |
| <b>5</b> | 96.36      | 107.99     | 108.58     | 64.15      | 149.01         | 65.82          |
| <b>6</b> | 80.28      | 90.00      | 90.59      | 51.31      | 131.77         | 55.09          |
| <b>7</b> | 90.84      | 101.41     | 102.01     | 60.11      | 140.52         | 59.65          |
| <b>8</b> | 75.05      | 85.23      | 85.82      | 44.96      | 137.04         | 56.83          |

### 4. Calculations description

Density and heat of formation (HOF) are important parameters of an energetic material. The density was predicted by using an improved equation proposed by Politzer<sup>1</sup> referring to intermolecular interactions within the crystal as follows:

$$\rho = \alpha \left( \frac{M}{V(0.001)} \right) + \beta (v\sigma_{Tot}^2) + \gamma \quad (1)$$

Where  $M$  is molecular mass in g/molecule;  $V(0.001)$  is volume in cm<sup>3</sup>/molecule, which is average value of calculated molecular volumes by using a Monte Carlo integration embedded in Gaussian program<sup>2</sup>; The  $v\sigma_{Tot}^2$  is derived from the molecular electrostatic potential calculation, which is performed by using the Multiwfn program<sup>3</sup>;  $\alpha$ ,  $\beta$  and  $\gamma$  are coefficients from the reference (0.9183, 0.0028, 0.0443).<sup>1</sup>

The heat of formation was determined by deducting the enthalpy of sublimation either vaporization<sup>4,5</sup> based on the Hess' law<sup>6</sup>.

$$\Delta H(Solid) = \Delta H(Gas) - \Delta H(Sublimation) \quad (2)$$

$$\Delta H(Liquid) = \Delta H(Gas) - \Delta H(Vaporization) \quad (3)$$

$$\Delta H(Sublimation) = a(SA)^2 + b\sqrt{\sigma_{Tot}^2}v + c \quad (4)$$

$$\Delta H(\text{Vaporization}) = a\sqrt{(SA)} + b\sqrt{\sigma_{Tot}^2}v + c \quad (5)$$

Where (SA) is the molecular surface area for this structure,  $\sigma_{Tot}^2$  is described as an indicator of the variability of the electrostatic potential on the molecular surface, and  $v$  is the degree of balance between the positive and negative potentials on the molecular surface. And where a, b, and c are fitting parameters (sublimation: 0.00042343, 2.5793785, -6.7335407; vaporization: 1.818689, 1.3321583, -16.14246).

And the heat of formation of gas-phase was calculated *via* atomization energies method<sup>7</sup> as follows:

$$\Delta H_f(A_xB_y, 0K) = x\Delta H^0(A, 0K) + y\Delta H^0(B, 0K) - \sum D_0 \quad (6)$$

Where  $\Delta H^0$  is the heat of formation of isolated atoms;  $D_0$  is calculated atomization energies.

The detonation velocity and detonation pressure are the key parameters to assess the potential of an energetic material and were predicted by Empirical Kamlet-Jacobs equations<sup>8</sup>:

$$V_D = 1.01 \left( N \bar{M}^{\frac{1}{2}} Q^{\frac{1}{2}} \right)^{\frac{1}{2}} (1 + 1.30\rho) \quad (7)$$

$$P_D = 1.558\rho^2 N \bar{M}^{\frac{1}{2}} Q^{\frac{1}{2}} \quad (8)$$

Where  $V_D$  is detonation velocity (km/s);  $P_D$  is detonation pressure (GPa);  $N$  is moles of detonation gases per gram explosive;  $\bar{M}$  is average molecular weight of these gases;  $Q$  is heat of detonation (cal/g); and  $\rho$  is the theoretical density (g/cm<sup>3</sup>) here.

In order to investigate the sensitivity of explosives, the property-structure relation method “generalized interaction property function” (GIPF) was used to estimate the impact sensitivity  $h_{50\%}$ . Here we give four introduced methods summarized below<sup>9</sup>:

$$\text{Method 1: } h_{50\%} = 9.2 + 8.03 \times 10^2 \times \exp\left[-(0.0875 \text{ mol/kJ} \times |V^+ - |V^-||)\right] \quad (9)$$

$$\text{Method 2: } h_{50\%} = 29.3 + 1.386 \times 10^{-3} \times \exp[48.84 \cdot v] \quad (10)$$

$$\text{Method 3: } h_{50\%} = 27.8 + 0.1135 \times \exp\left[-(2.6479 \text{ g/kJ} \times [Q_d - 6.9496 \text{ kJ/g}])\right] \quad (11)$$

$$\text{Method 4: } h_{50\%} = 1.341 \times \exp\left[8.1389 \cdot v - 1.6234 \text{ g/kJ} \times (Q_d - 6.166 \text{ kJ/g})\right] \quad (12)$$

$|\bar{V}^+ - \bar{V}^-|$  is the difference between magnitudes of average values of the positive and negative electrostatic potential;  $v$  is balance parameter, and  $Q_d$  is heat of detonation.

## 5. References

1. P. Politzer, J. Martinez, J. S. Murray, M. C. Concha and A. Toro-Labbé, *Mol. Phys.*, 2009, **107**, 2095-2101.
2. M. J. Frisch, G. W. Trucks, H. B. Schlegel, G. E. Scuseria, M. A. Robb, J. R. Cheeseman, G. Scalmani, V. Barone, B. Mennucci and G. A. Petersson, *GAUSSIAN 09*, (2009) Gaussian, Inc., Wallingford CT.
3. T. Lu, *Multiwfn, version 1.4*: <http://multiwfn.codeplex.com/>.
4. J. S. Murray and P. Politzer, *Quantitative Treatment of Solute/Solvent Interactions, Theoretical and Computational Chemistry*, Elsevier Scientific, Amsterdam, 1994.
5. P. Politzer, J. S. Murray, T. Brinck and P. Lane, *Immunoanalysis of Agrochemicals*, ACS Symp. Ser. 586, American Chemical Society, Washington, DC, 1994.
6. P. W. Atkins, *Physical Chemistry*, Oxford University Press, Oxford, 1982.
7. L. A. Curtiss, K. Raghavachari, P. C. Redfern and J. A. Pople, *J. Chem. Phys.*, 1997, **106**, 1063-1066.
8. M. J. Kamlet and S. J. Jacobs, *J. Chem. Phys.*, 1968, **48**, 23-35.
9. B. M. Rice and J. J. Hare, *J. Phys. Chem. A*, 2002, **106**, 1770-1783.
